# Supplementary material for: An in situ generated amorphous CoFePi and crystalline Ni(PO3)2 heterojunction as an efficient electrocatalyst for oxygen evolution
Source: Royal Society of Chemistry journal article supplement (doi:10.1039/c8ta10378j), 2018-01-01
Supplement: c8ta10378j1.pdf [file c8ta10378j1.pdf]

Electronic Supplementary Information

***In situ* generated amorphous CoFePi and crystalline Ni(PO<sub>3</sub>)<sub>2</sub> heterojunction as an efficient electrocatalyst for oxygen evolution**

Dong-Cheng Liu,<sup>ab†</sup> Li-Ming Cao,<sup>b†</sup> Zhi-Mei Luo,<sup>b</sup> Di-Chang Zhong,<sup>a\*</sup> Jing-Bo Tan,<sup>b</sup>  
and Tong-Bu Lu<sup>ab\*</sup>

<sup>a</sup> Institute for New Energy Materials & Low Carbon Technologies, School of Materials Science & Engineering, Tianjin University of Technology, Tianjin 300384, China.

<sup>b</sup> MOE Key Laboratory of Bioinorganic and Synthetic Chemistry, School of Chemistry, Sun Yat-Sen University, Guangzhou 510275, China.

† These authors contributed equally to this work.

\*Email - zhong\_dichang@hotmail.com

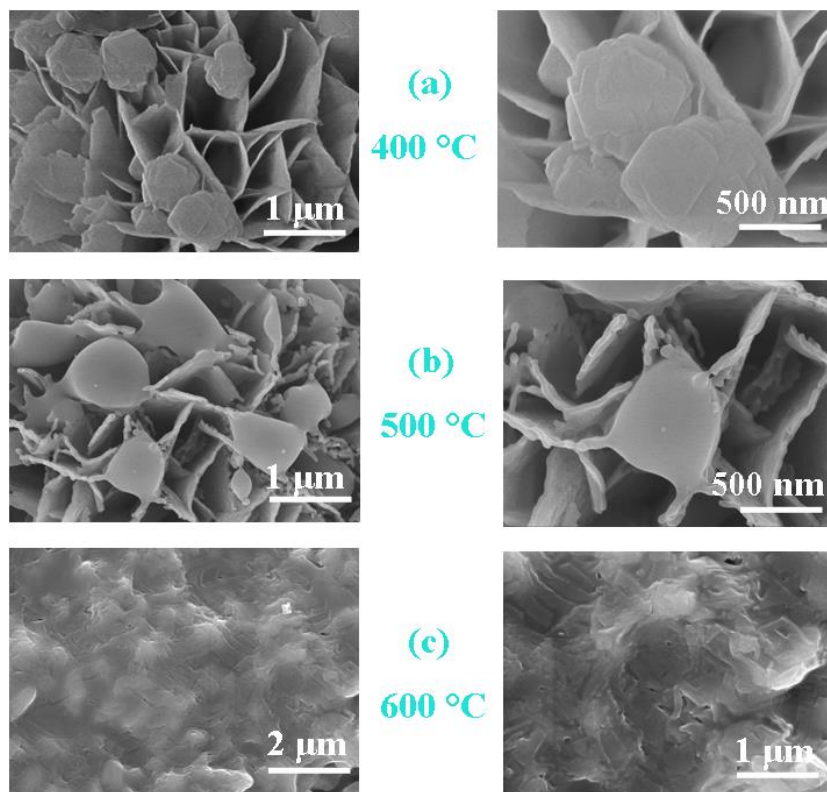

**Fig. S1** SEM images of CoFePi/Ni(PO<sub>3</sub>)<sub>2</sub>/CC prepared at the phosphorization temperature of a) 400, b) 500, and c) 600 °C for 2 h, respectively.

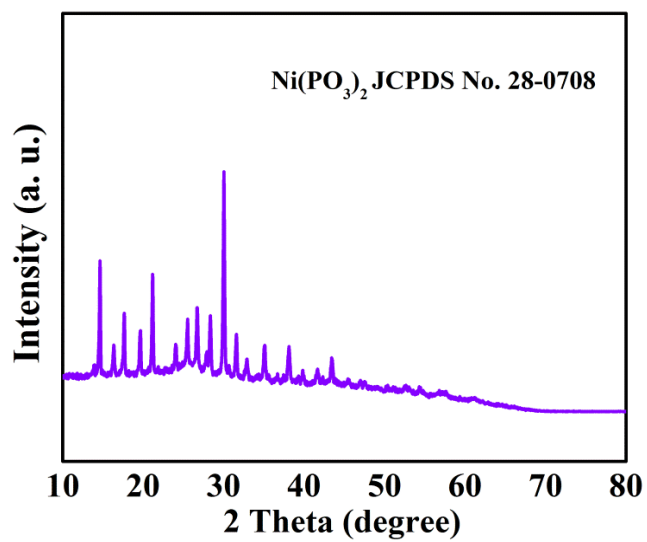

**Fig. S2** XRD pattern of Ni(PO<sub>3</sub>)<sub>2</sub> powder sample.

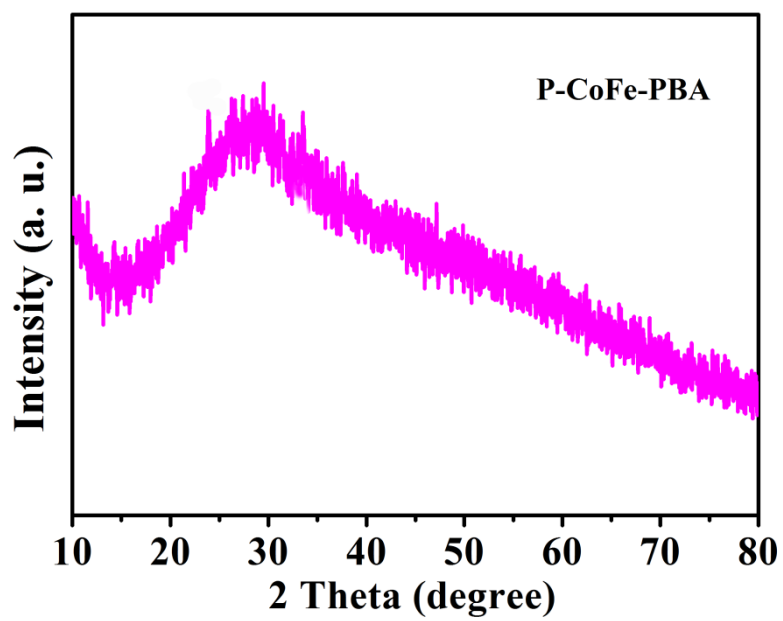

**Fig. S3** XRD pattern of P-CoFe-PBA powder.

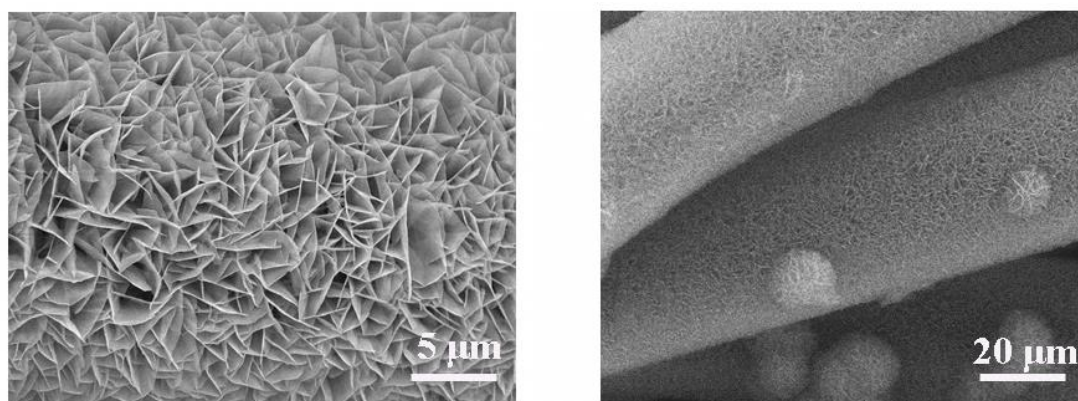

**Fig. S4** SEM images of Ni(OH)<sub>2</sub>/CC.

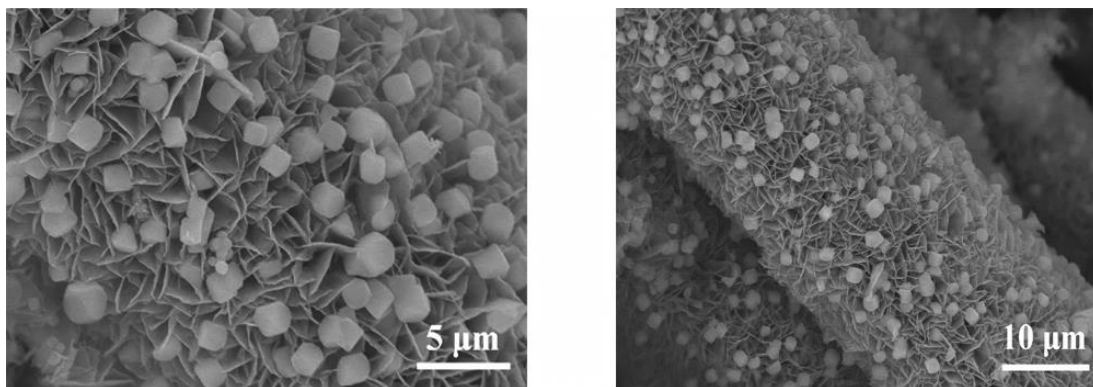

**Fig. S5** SEM images of CoFe-PBA/Ni(OH)<sub>2</sub>/CC.

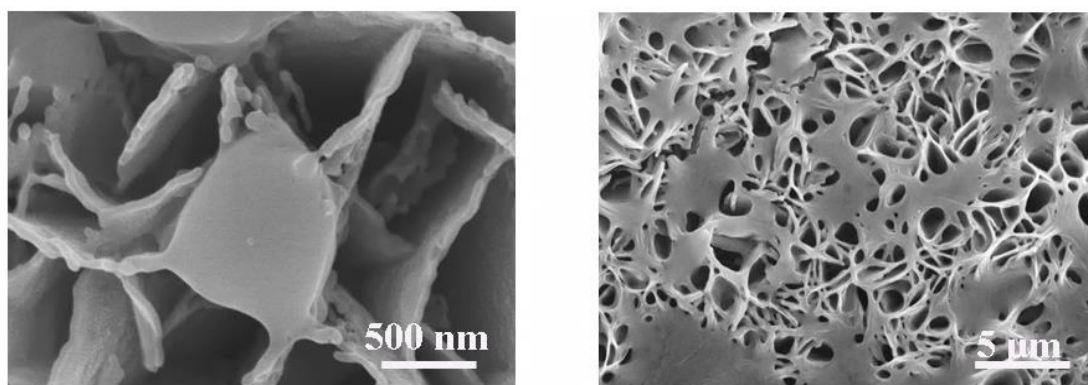

**Fig. S6** SEM images of CoFePi/Ni(PO<sub>3</sub>)<sub>2</sub>/CC.

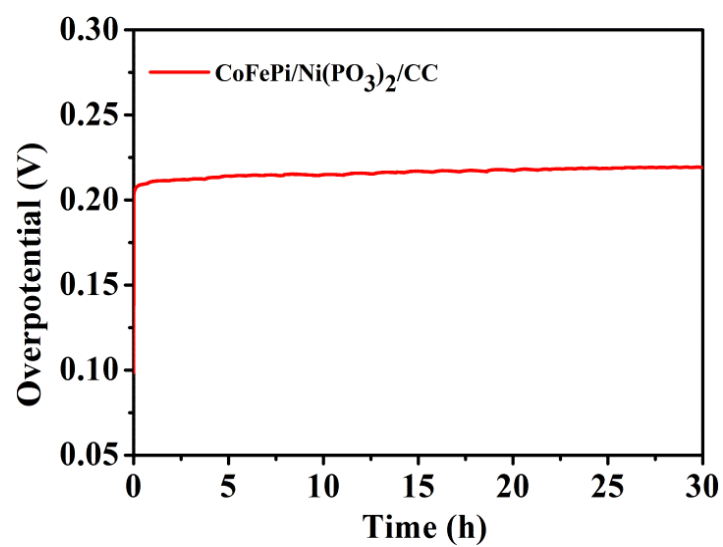

**Fig. S7** Current density trace of CoFePi/Ni(PO<sub>3</sub>)<sub>2</sub>/CC for 30 h.

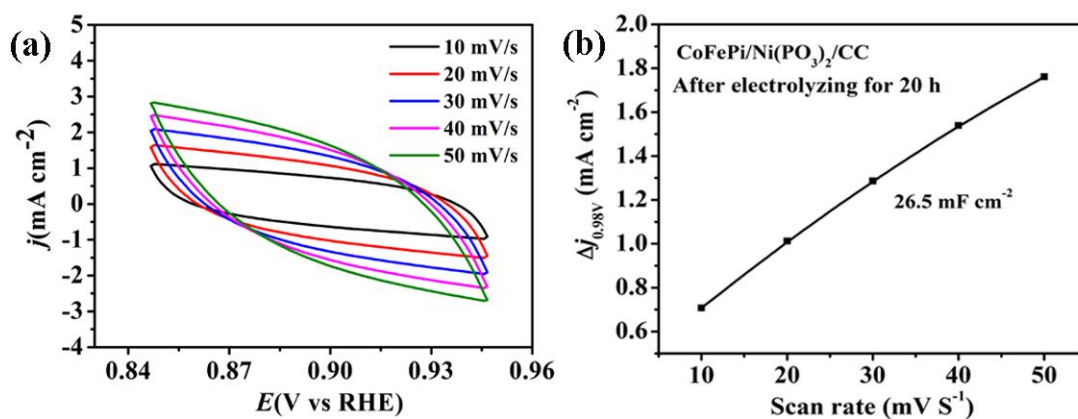

**Fig. S8** (a) CVs of CoFePi/Ni(PO<sub>3</sub>)<sub>2</sub>/CC after OER for 20h. (b) The capacitive current density  $\Delta j_{0.98V}$  as a function of scan rate in the range of 0.85-0.95 V vs. RHE.

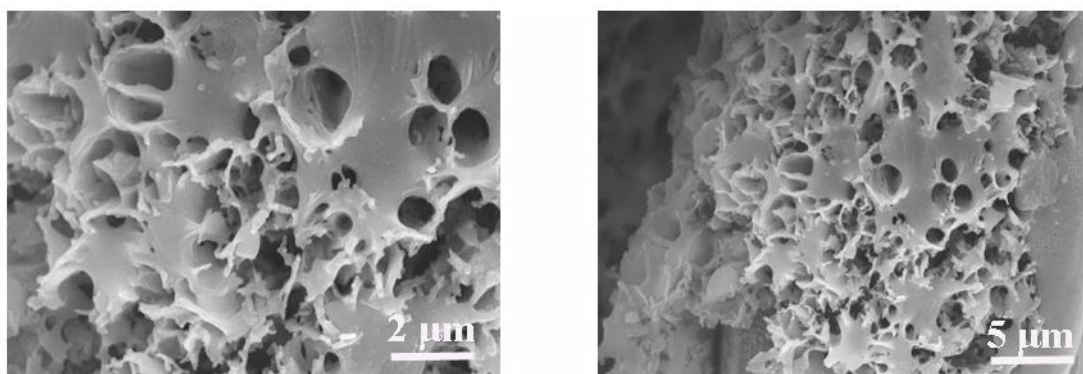

**Fig. S9** SEM images of CoFePi/Ni(PO<sub>3</sub>)<sub>2</sub>/CC after OER for 20h.

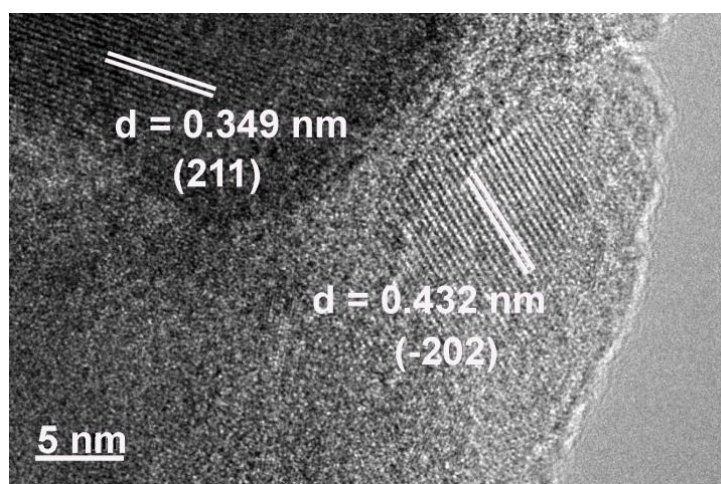

**Fig. S10** HRTEM image of CoFePi/Ni(PO<sub>3</sub>)<sub>2</sub>/CC after OER for 20h.

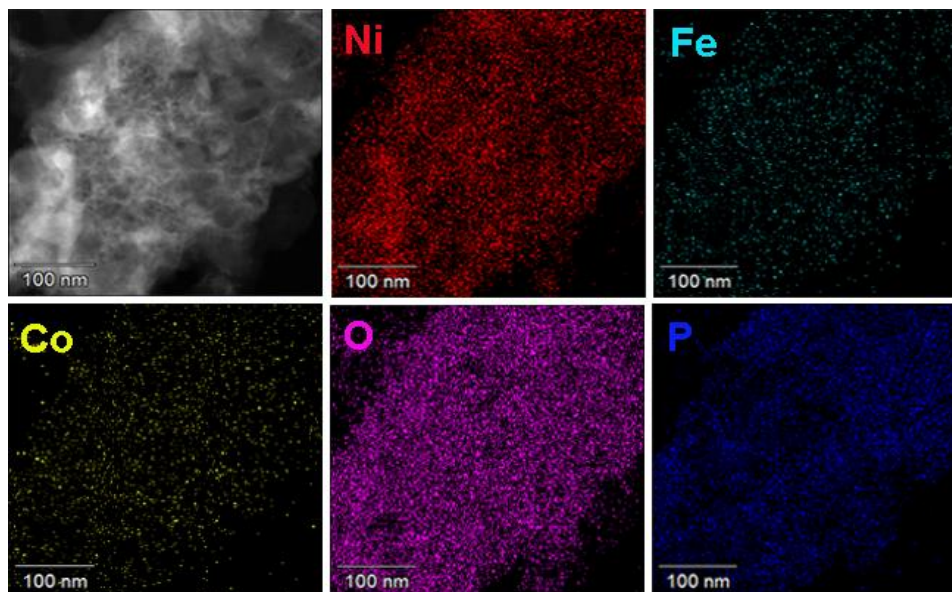

**Fig. S11** STEM images and the corresponding elemental mapping of CoFePi/Ni(PO<sub>3</sub>)<sub>2</sub>/CC after OER for 20h.

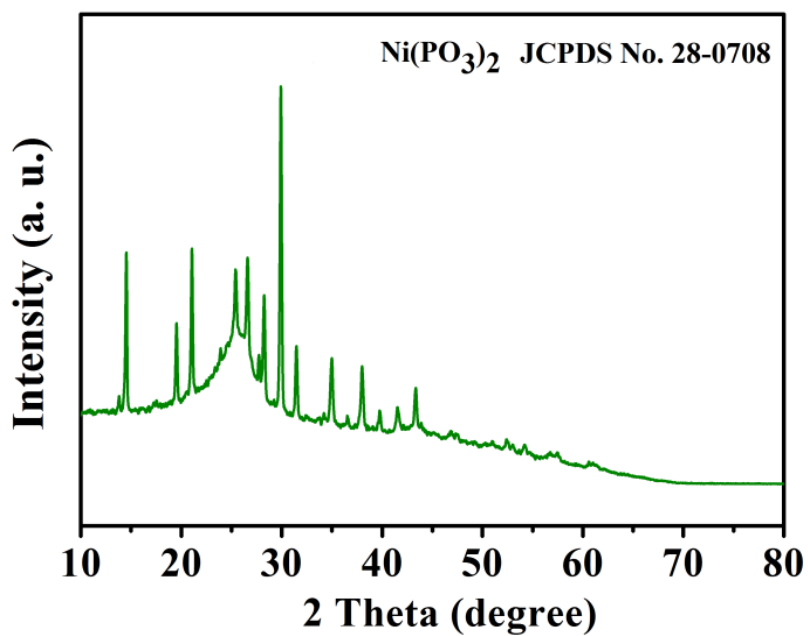

**Fig. S12** XRD pattern of CoFePi/Ni(PO<sub>3</sub>)<sub>2</sub>/CC after OER for 20h.

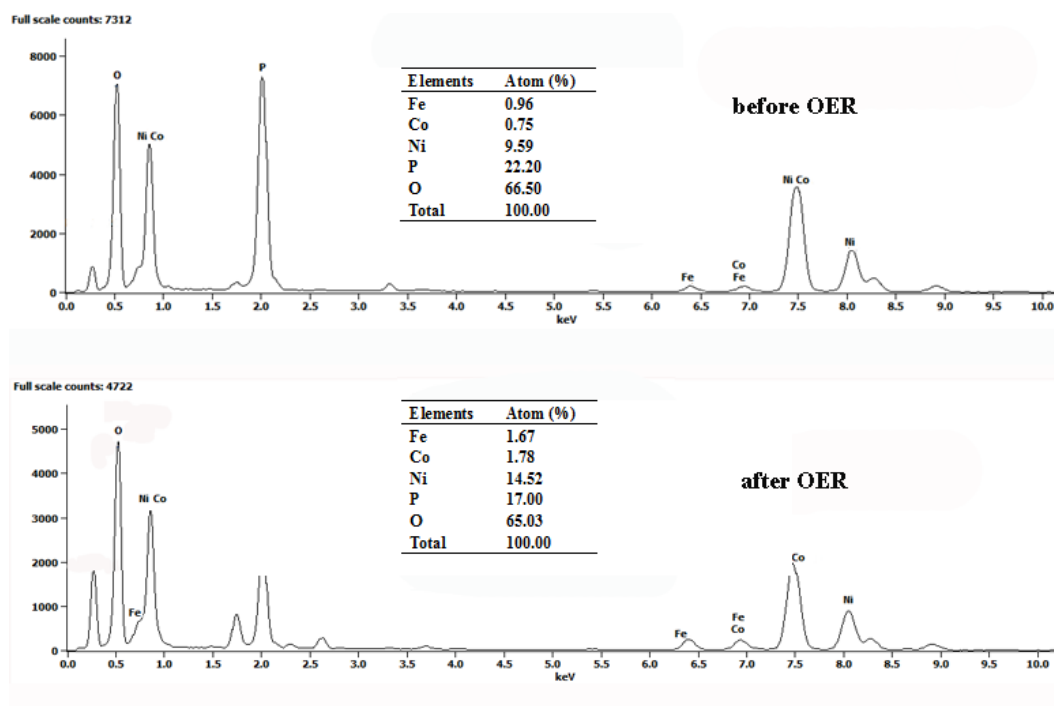

**Fig. S13** EDS of CoFePi/Ni(PO<sub>3</sub>)<sub>2</sub>/CC before and after OER for 20h.

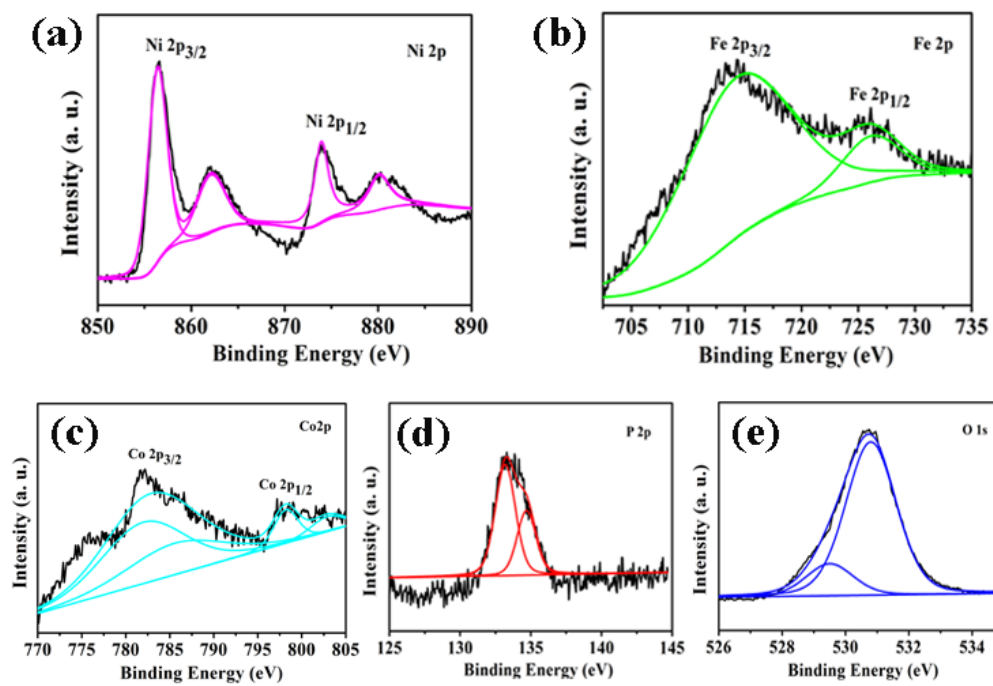

**Fig. S14** High resolution XPS spectra of (a) Ni 2p, (b) Fe 2p, (c) Co 2p, (d) P 2p, and (e) O1s for CoFePi/Ni(PO<sub>3</sub>)<sub>2</sub>/CC after OER for 20h.

**Table S1.** The performance of CoFePi/Ni(PO<sub>3</sub>)<sub>2</sub> and reported electrocatalysts for OER.<sup>a</sup>

| Catalyst                                             | $\eta$ at 10 mA cm <sup>-2</sup> (mV) | Tafel slope (mV del <sup>-1</sup> ) | Mass loading (mg cm <sup>-2</sup> ) | Substrate <sup>b</sup> | Reference                                                             |
|------------------------------------------------------|---------------------------------------|-------------------------------------|-------------------------------------|------------------------|-----------------------------------------------------------------------|
| <b>CoFePi/Ni(PO<sub>3</sub>)<sub>2</sub></b>         | <b>213</b>                            | <b>39</b>                           | <b>1.37</b>                         | <b>CC</b>              | <b>This work</b>                                                      |
| Co <sub>3</sub> (PO <sub>4</sub> ) <sub>2</sub> @N-C | 317                                   | 62                                  | N.A.                                | GCE                    | <i>J. Mater. Chem. A</i> , <b>2016</b> , <i>4</i> , 8155-8160.        |
| NiFe LDH@NiCoP                                       | 220                                   | 88.2                                | 2.0                                 | NF                     | <i>Adv. Funct. Mater.</i> <b>2018</b> , <i>28</i> , 1706847.          |
| NiFePi/P                                             | 230                                   | 57                                  | N.A.                                | NF                     | <i>J. Mater. Chem. A</i> , <b>2018</b> , <i>6</i> , 7509-7516.        |
| Ni:Pi-Fe                                             | 220                                   | 37                                  | N.A.                                | NF                     | <i>Chem. Mater.</i> , <b>2016</b> , <i>28</i> , 5659-5666.            |
| Ni <sub>5</sub> P <sub>4</sub>                       | 290                                   | 40                                  | 3.48                                | Ni foil                | <i>Angew. Chem. Int. Ed.</i> , <b>2015</b> , <i>54</i> , 12361-12365. |
| Ni <sub>2</sub> P                                    | 290                                   | 47                                  | 0.14                                | GCE                    | <i>Energy Environ. Sci.</i> , <b>2015</b> , <i>8</i> , 2347-2351.     |
| Co-Fe-P                                              | 244                                   | 58                                  | 1.03                                | NF                     | <i>ACS Appl. Mater. Interf.</i> , <b>2017</b> , <i>9</i> , 362-370.   |
| NiCoP                                                | 242                                   | 64.2                                | 2.0                                 | CC                     | <i>ACS Catal.</i> , <b>2017</b> , <i>7</i> , 413-420.                 |
| Ni <sub>1.5</sub> Fe <sub>0.5</sub> P                | 264                                   | 55                                  | 1.38                                | CFP                    | <i>Nano Energy</i> , <b>2017</b> , <i>34</i> , 472-480.               |
| CoMnP                                                | 330                                   | 61                                  | 0.28                                | GCE                    | <i>J. Am. Chem. Soc.</i> , <b>2016</b> , <i>138</i> , 4006-4009.      |
| NiCoP@C                                              | 330                                   | 96                                  | 0.25                                | GCE                    | <i>Angew. Chem. Int. Ed.</i> , <b>2017</b> , <i>56</i> , 3897-3900.   |
| FeP@rGO                                              | 260                                   | 175                                 | ~0.71                               | CFP                    | <i>J. Mater. Chem. A</i> , <b>2016</b> , <i>4</i> , 9750-9754.        |
| MoS <sub>2</sub> /Ni <sub>3</sub> S <sub>2</sub>     | 218                                   | 88                                  | 9.7                                 | NF                     | <i>Angew. Chem. Int. Ed.</i> <b>2016</b> , <i>55</i> , 6702-6707.     |
| S-NiCoFe LDH                                         | 206                                   | 46                                  | 1.05                                | CC                     | <i>J. Mater. Chem. A</i> , <b>2018</b> , <i>6</i> , 3224-3230.        |
| NiFeO <sub>x</sub>                                   | 230                                   | 31.5                                | 1.6                                 | CFP                    | <i>Nat. Commun.</i> , <b>2015</b> , <i>6</i> , 7261.                  |
| CoFe <sub>2</sub> O <sub>4</sub> /C NRAs             | 240                                   | 45                                  | 0.424                               | NF                     | <i>Adv. Mater.</i> , <b>2017</b> , <i>29</i> , 1604437.               |
| Gelled FeCoW                                         | 191                                   | 37                                  | 0.21                                | NF                     | <i>Science</i> , <b>2016</b> , <i>352</i> , 333-337.                  |

<sup>a</sup>The electrolyte is 1.0 M KOH unless otherwise stated.  $\eta$  is overpotential. <sup>b</sup>NF = nickel foam; CFP = carbon fiber paper; CC = carbon cloth; GCE = glassy carbon electrode.
